# Supplementary material for: One-pot strategy to access dynamic dual network from lignin-initiated star polymers by side reaction and transesterification
Source: Royal Society of Chemistry journal article supplement (doi:10.1039/d4py00511b), 2024-01-01
Supplement: d4py00511b1.pdf [file d4py00511b1.pdf]

## Supporting information

### **One-pot Strategy to Access Dynamic Dual Network from Lignin-Initiated Star Polymers by Side Reaction and Transesterification**

Quan Yan<sup>a</sup>, Bailiang Xue<sup>a\*</sup>, Tonghe Zhang<sup>a</sup>, Wenliang Wang<sup>a</sup>, Xinpeng Li<sup>a</sup>, Xiaojun Shen<sup>b</sup>, Lulu Ning<sup>a</sup>, Xianzhi Meng<sup>c</sup>, Wei Zhao<sup>a</sup>

<sup>a</sup> College of Bioresources Chemical and Materials Engineering, Shaanxi University of Science and Technology, Xi'an 710021, Shaanxi, China.

<sup>b</sup> Beijing Key Laboratory of Lignocellulosic Chemistry, Beijing Forestry University, Beijing 100083, China

<sup>c</sup> Department of Chemical & Biomolecular Engineering, University of Tennessee Knoxville, Knoxville, TN 37996, USA

\*Corresponding authors at: College of Bioresources Chemical and Materials Engineering, Shaanxi University of Science & Technology, Xi'an, Shaanxi 710021, China. Tel.: +86-29-86168575. E-mail address: xuebailiang@sust.edu.cn (B.L. Xue).

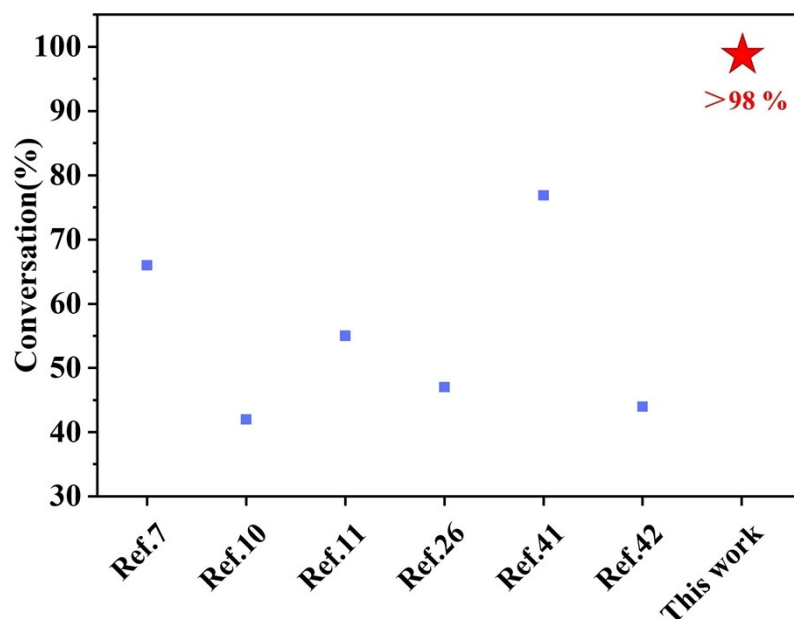

**Fig.S1.** Comparison of conversion rates with similar work in recent years.

**Table S1.** Formulations and properties of Lignin, L-CTA and star-shaped lignin-grafted copolymers.

| Samples                                                | [I]:[CTA]:[M <sub>1</sub> ]:[M <sub>2</sub> ] | Conv.(%)* | M <sub>n</sub> (g/mol) | PDI |
|--------------------------------------------------------|-----------------------------------------------|-----------|------------------------|-----|
| THF-L                                                  | -                                             | -         | 722                    | 2.0 |
| L-Br                                                   | -                                             | -         | 3544                   | 1.9 |
| L-CTA                                                  | -                                             | -         | 5687                   | 1.4 |
| L-PBA <sub>100</sub>                                   | 0.2:1:100:0                                   | 70.8      | 16482                  | 2.0 |
| L-PBA <sub>300</sub>                                   | 0.2:1:300:0                                   | 68.9      | 31787                  | 2.0 |
| L-PBA <sub>500</sub>                                   | 0.2:1:500:0                                   | 73.6      | 50600                  | 2.4 |
| L-P(BA <sub>475</sub> - <i>co</i> -GMA <sub>25</sub> ) | 0.2:1:475:25                                  | 75.8      | 49181                  | 2.2 |
| L-P(BA <sub>450</sub> - <i>co</i> -GMA <sub>50</sub> ) | 0.2:1:450:50                                  | 70.9      | 44550                  | 1.8 |
| L-P(BA <sub>425</sub> - <i>co</i> -GMA <sub>75</sub> ) | 0.2:1:425:75                                  | 77.3      | 50064                  | 2.4 |

\*This conversion rate is employed to characterise star-shaped lignin-grafted copolymers in the absence of star-star coupling.

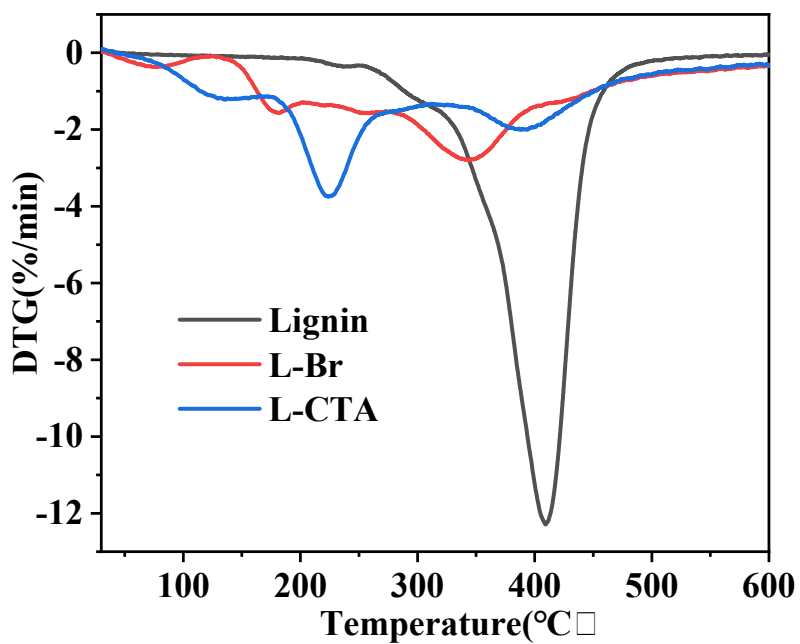

Fig.S2. DTG Images of Lignin, L-Br, and L-CTA.

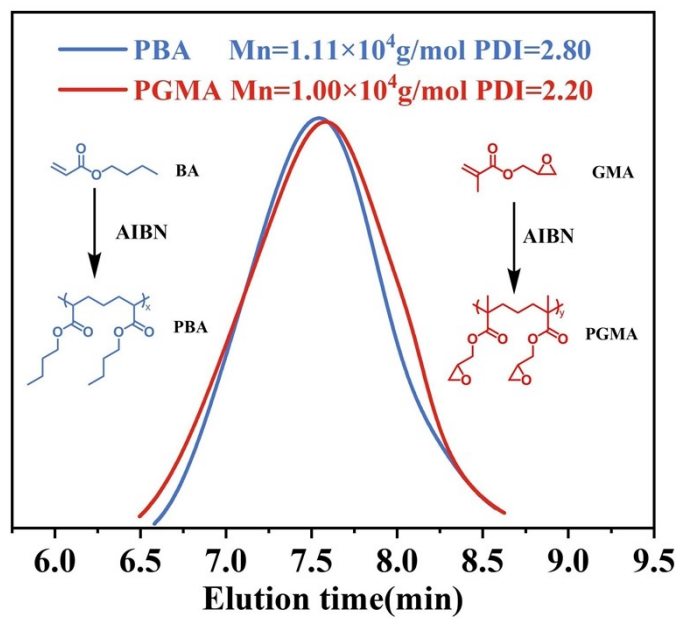

Fig.S3. Verification experiment of the polymerization of monomers and initiators.

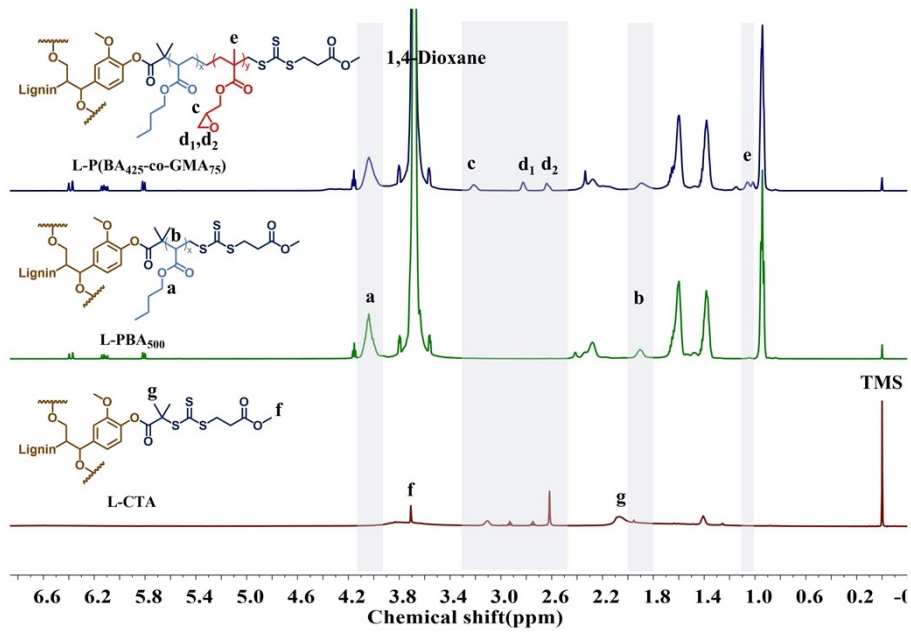

**Fig. S4.**  $^1\text{H}$  NMR of L-PBA<sub>500</sub>, L-P(BA<sub>425</sub>-co-GMA<sub>75</sub>) and L-CTA.

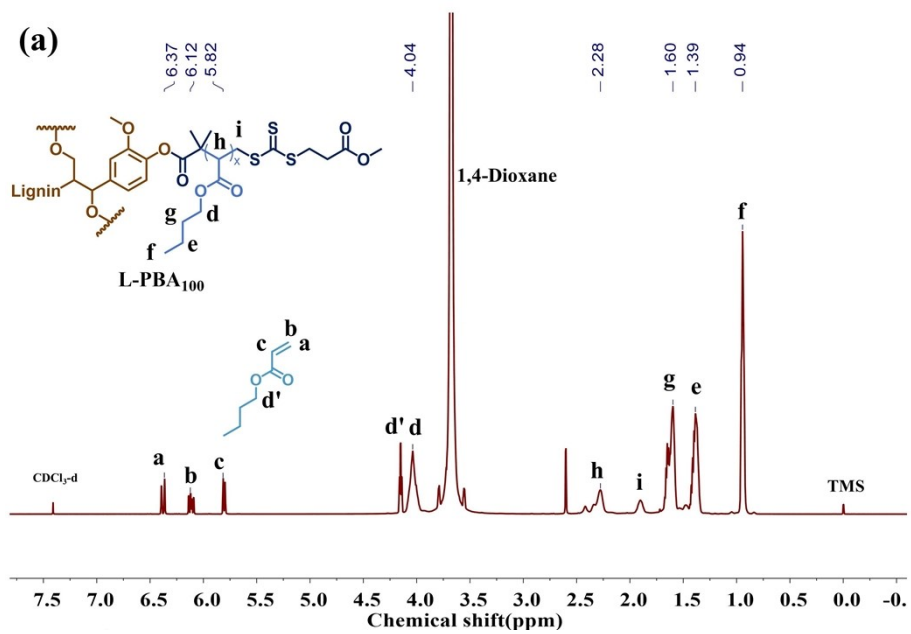

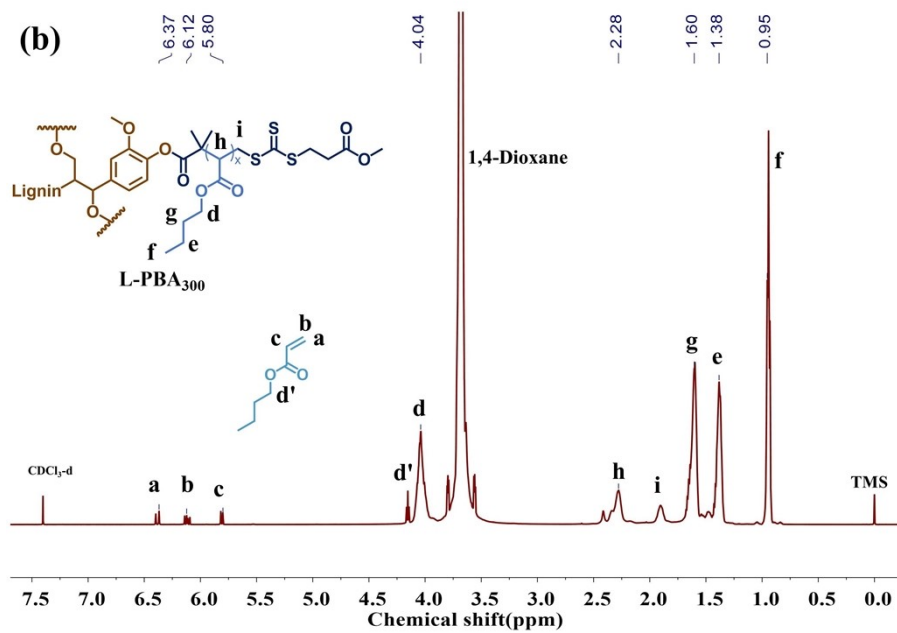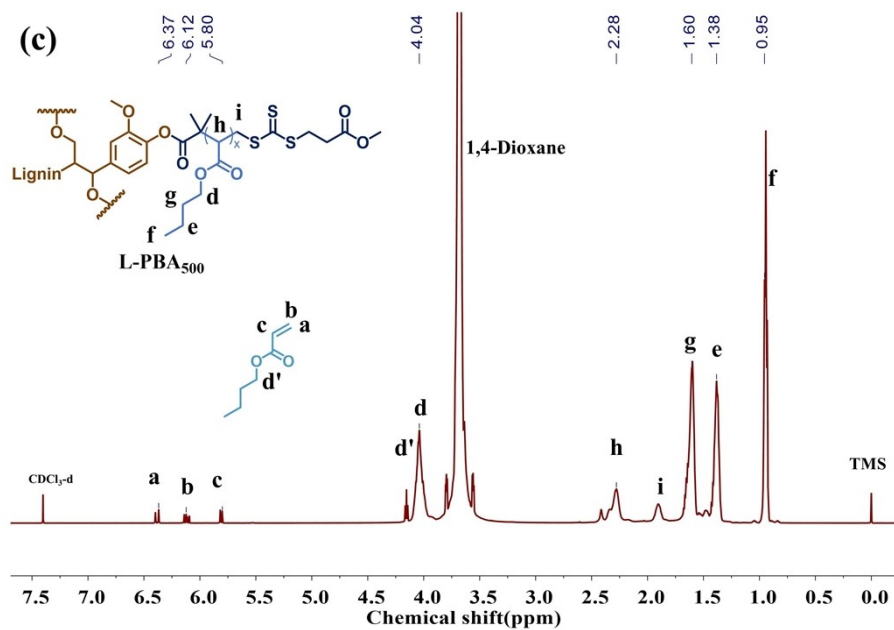

**Fig.S5.** <sup>1</sup>H NMR and characteristic peak display for (a) L-PBA<sub>100</sub>; (b) L-PBA<sub>300</sub>; (c) L-PBA<sub>500</sub>.

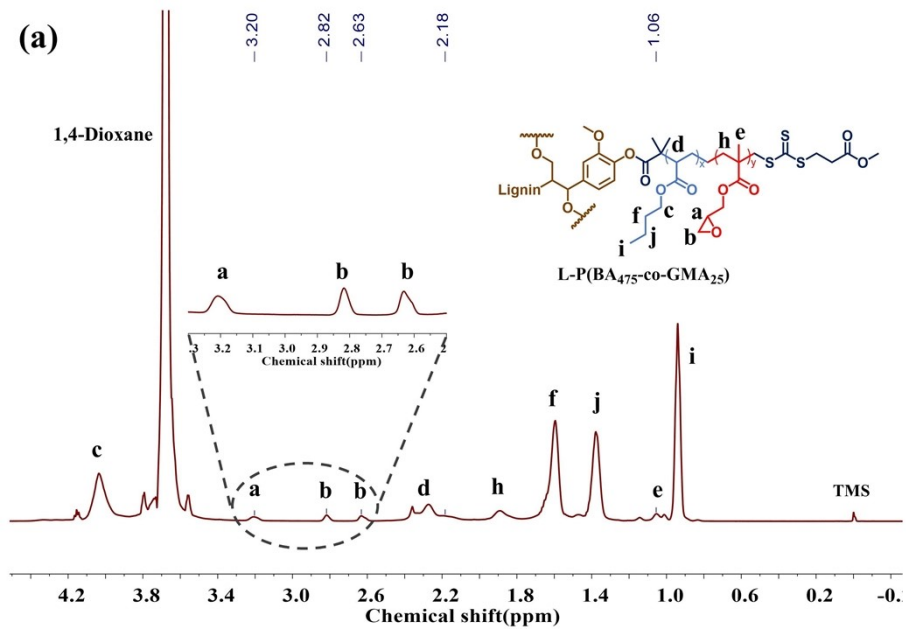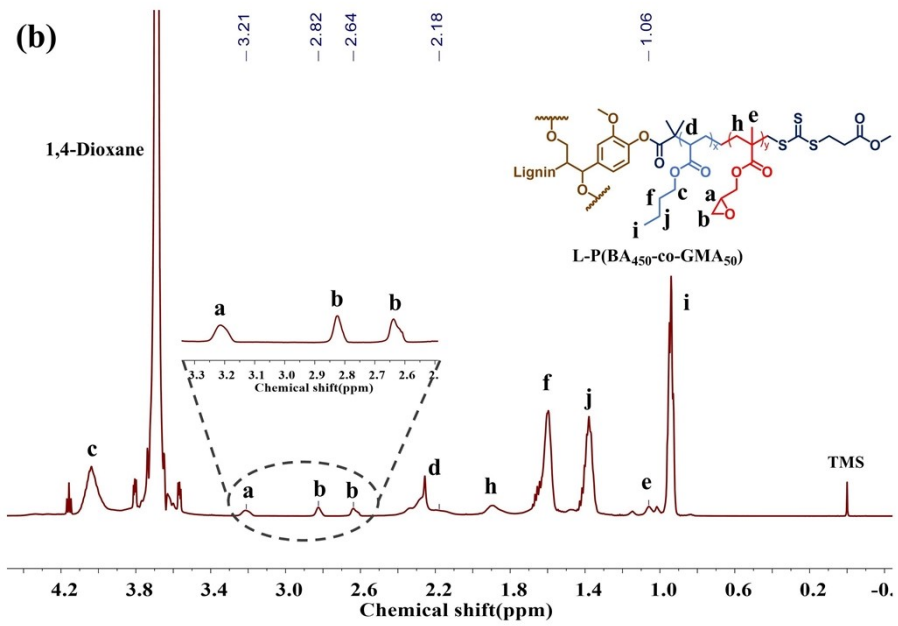

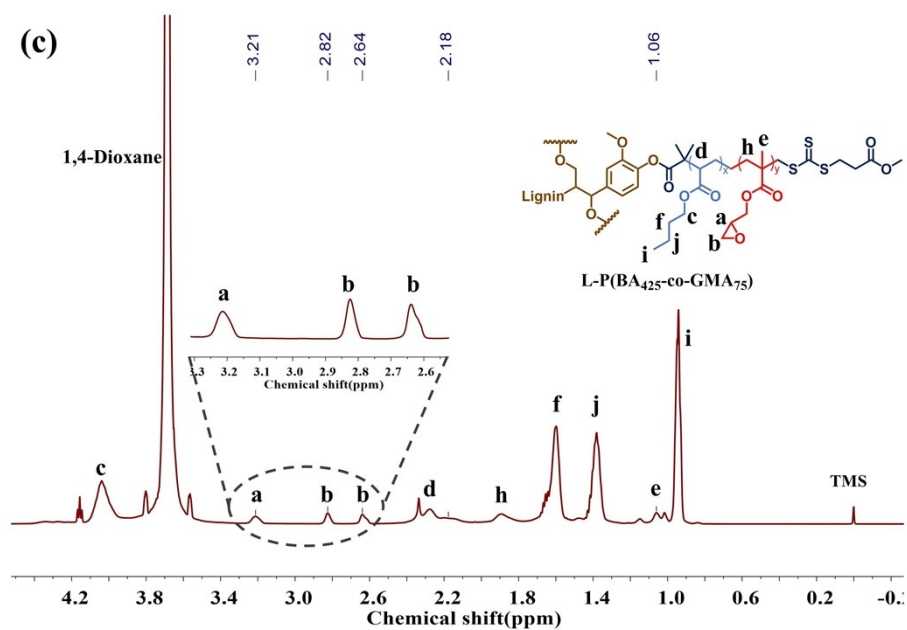

**Fig.S6.**  $^1\text{H}$  NMR and characteristic peak display for (a)L-P(BA<sub>475</sub>-co-GMA<sub>25</sub>) ;(b)L-P(BA<sub>450</sub>-co-GMA<sub>50</sub>) ;(c)L-P(BA<sub>425</sub>-co-GMA<sub>75</sub>).

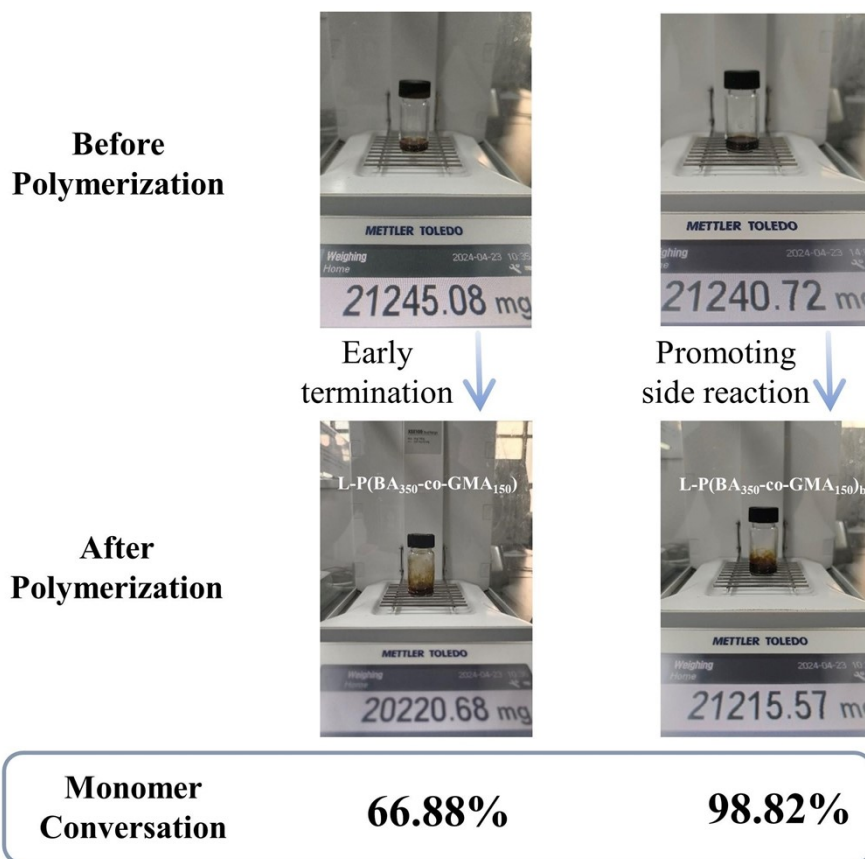

**Fig.S7.** Monomer conversion of L-P(BA<sub>350-co</sub>-GMA<sub>150</sub>)<sub>b</sub> and L-P(BA<sub>350-co</sub>-GMA<sub>150</sub>).

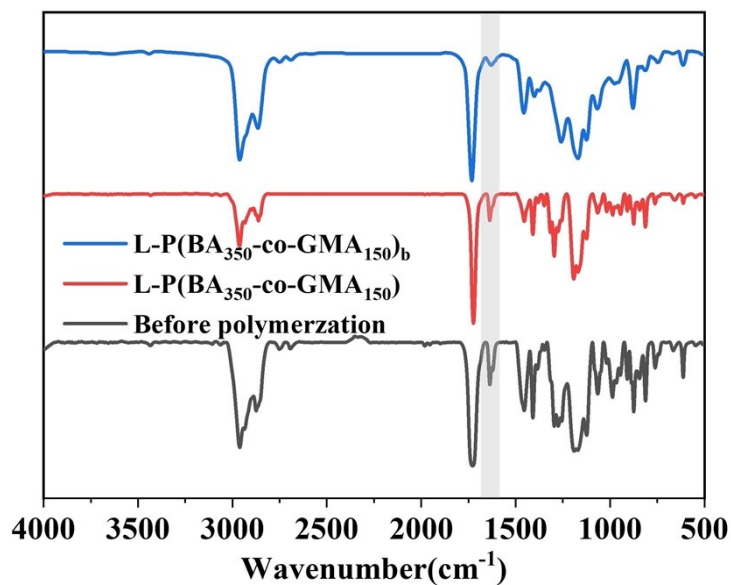

**Fig.S8.** FT-IR of the solution before polymerization, L-P(BA<sub>350-co</sub>-GMA<sub>150</sub>) and L-P(BA<sub>350-co</sub>-GMA<sub>150</sub>)<sub>b</sub>.

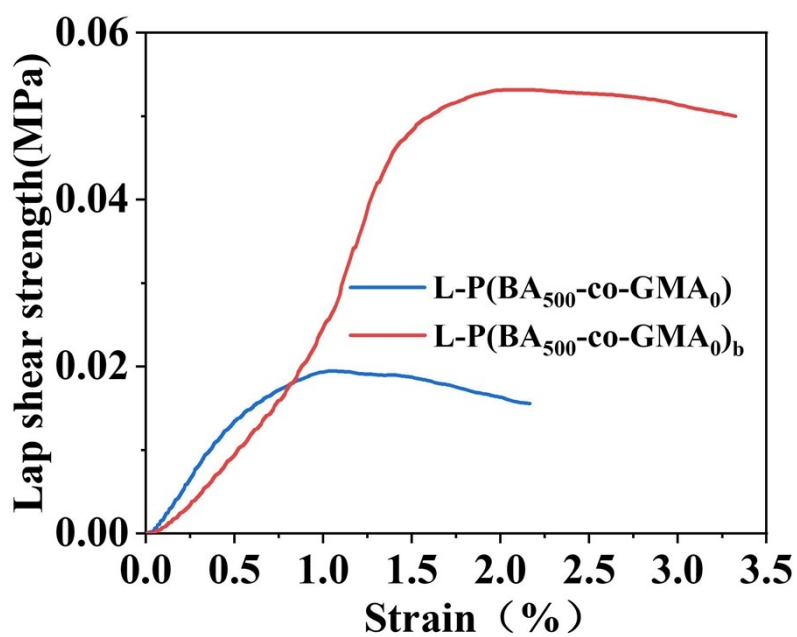

**Fig.S9.** Bonding performance of L-P(BA<sub>500-co</sub>-GMA<sub>0</sub>)<sub>b</sub> and L-P(BA<sub>500-co</sub>-GMA<sub>0</sub>).



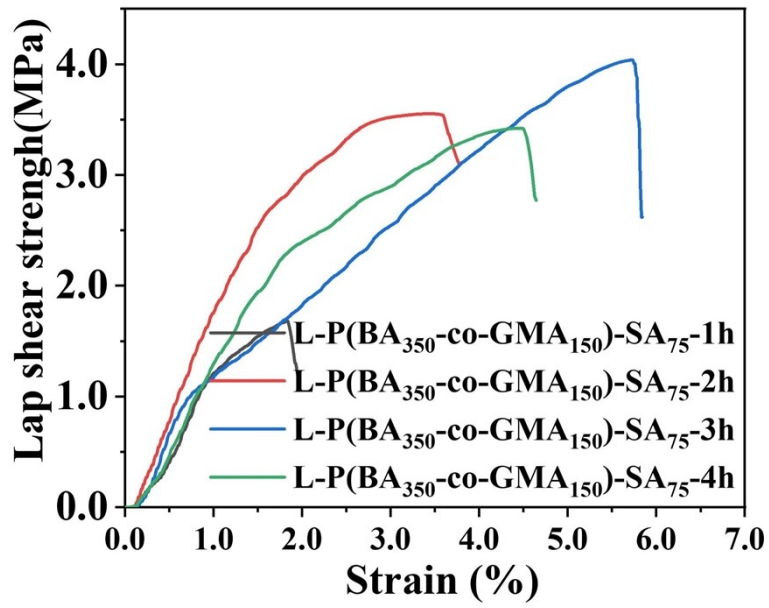

Fig. S10. Lap shear strength of different curing times.

**Crosslinking density increases**

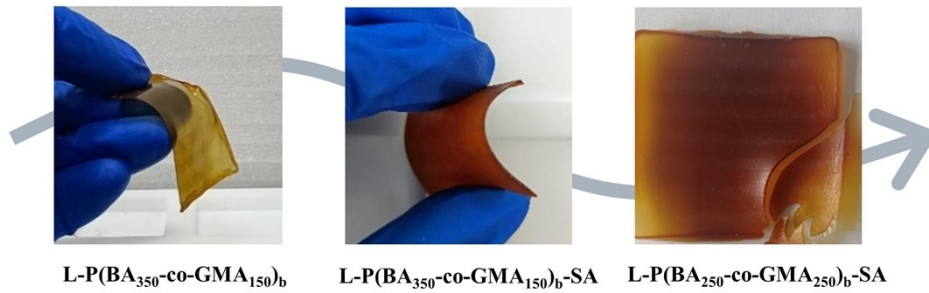

Fig.S11. Images of star-shaped lignin-grafted copolymers samples with varying degrees of cross-linking.
